# Supplementary material for: Landfill leachate treatment by the symbiotic system of bacteria and microalgae: high-efficiency and low-consumption green biological treatment system
Source: Royal Society of Chemistry journal article supplement (doi:10.1039/d6ra02058e), 2026-04-07
Supplement: d6ra02058e1.pdf [file d6ra02058e1.pdf]

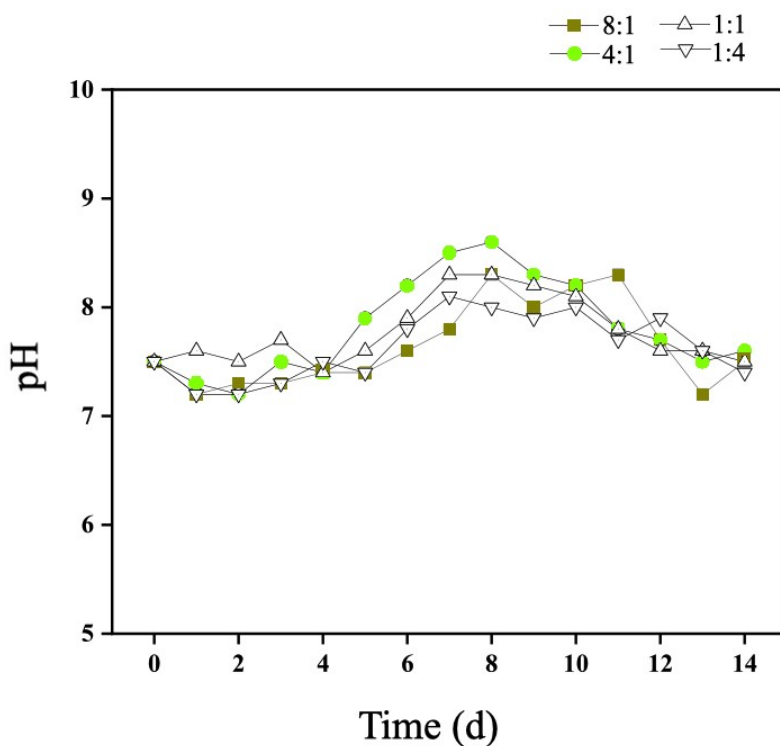

Fig. SI1 Effect of different inoculation ratios on pH

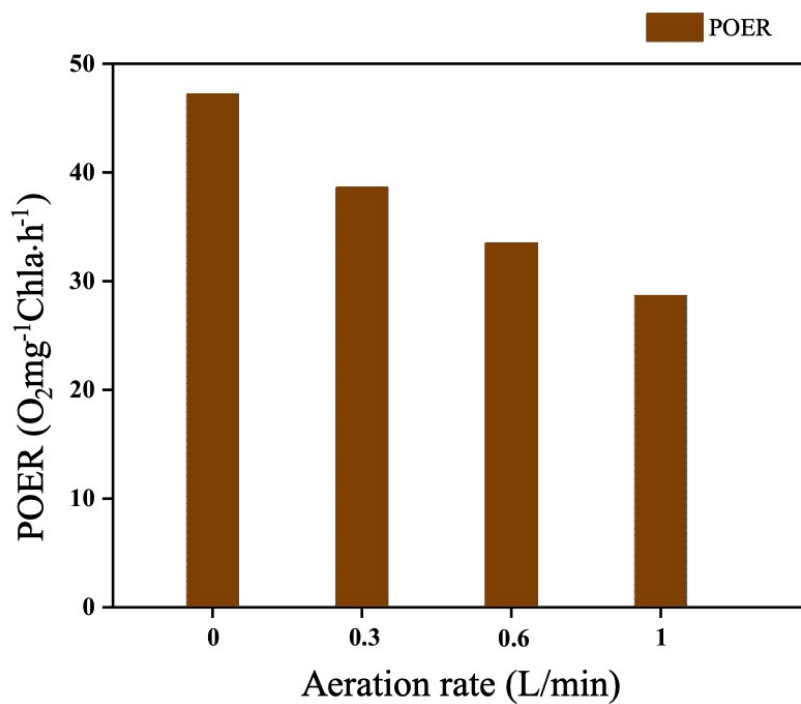

Fig. SI2 POER changes at different aeration rates
